# Supplementary material for: Solvothermal synthesis of graphene/BiOCl0.75Br0.25 microspheres with excellent visible-light photocatalytic activity
Source: Royal Society of Chemistry journal article supplement (doi:10.1039/c5ra02852c), 2015-01-01
Supplement: c5ra02852c1.pdf [file c5ra02852c1.pdf]

## Supporting Information

### **Solvothermal synthesis of graphene-BiOCl<sub>0.75</sub>Br<sub>0.25</sub> microspheres with excellent visible-light photocatalytic activity**

Yang Liu <sup>a, b</sup>, Xingzhong Yuan <sup>a, b \*</sup>, Hou Wang <sup>a, b</sup>, Xiaohong Chen <sup>c</sup>, Shansi Gu <sup>a, b</sup>,

Qian Jiang <sup>a, b</sup>, Zhibin Wu <sup>a, b</sup>, Longbo Jiang <sup>a, b</sup>, Yan Wu,<sup>d</sup> Guangming Zeng <sup>a, b</sup>

<sup>a</sup> College of Environmental Science and Engineering, Hunan University, Changsha  
410082, PR China

<sup>b</sup> Key Laboratory of Environment Biology and Pollution Control, Hunan University,  
Ministry of Education, Changsha 410082, PR China

<sup>c</sup> School of Business, Central South University, Changsha 410083, PR China

<sup>d</sup> College of Environment and Energy, South China University of Technology,  
Guangzhou 510006, P.R. China

---

\* Corresponding author at: College of Environmental Science and Engineering, Hunan University, Changsha 410082, PR China. Tel.: +86 731 88821413; fax: +86 731 88823701.  
E-mail address: [yxz@hnu.edu.cn](mailto:yxz@hnu.edu.cn) (X.Z. Yuan)

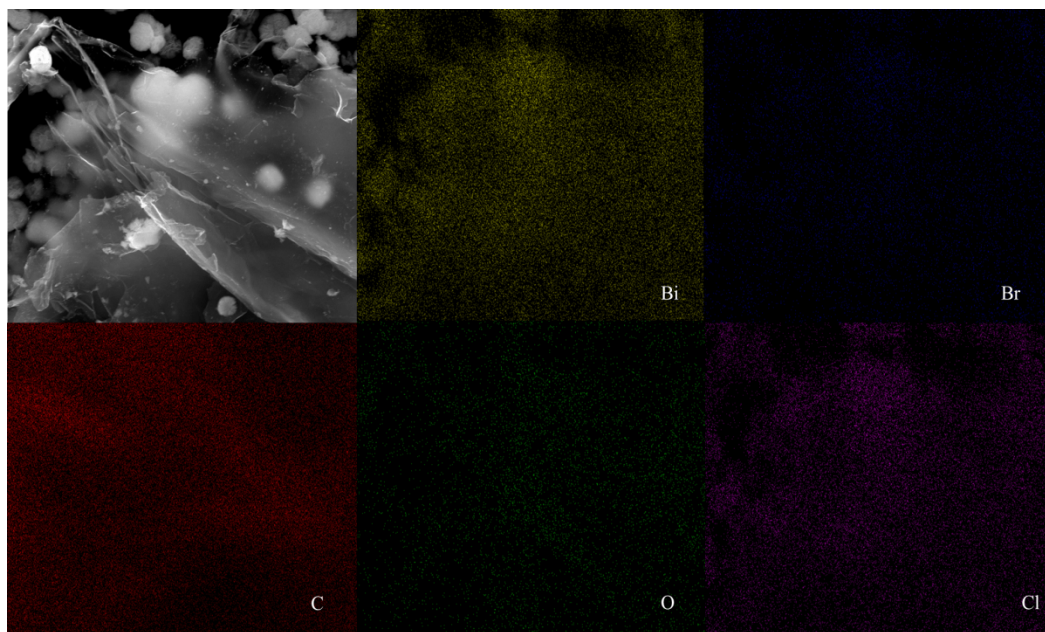

**Fig.S1.** The elemental mapping of the BG5.0 sample.

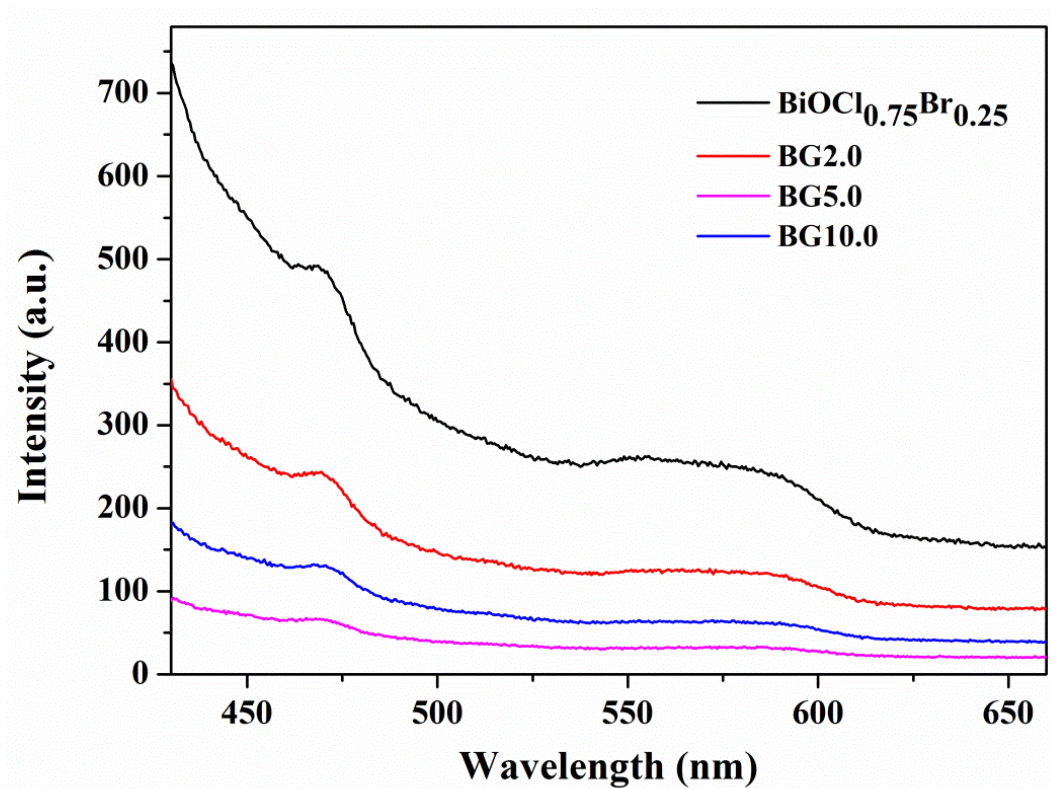

**Fig.S2.** PL spectra of the BiOCl<sub>0.75</sub>Br<sub>0.25</sub> and BG hybrids.

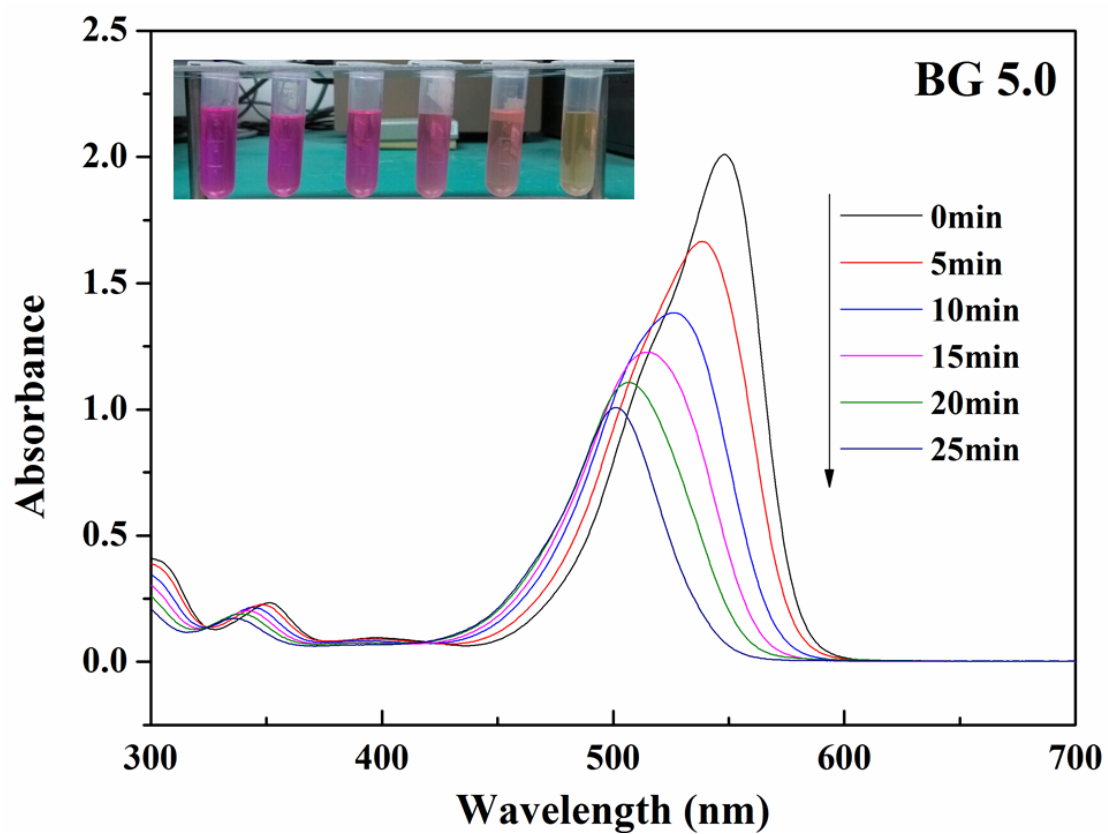

**Fig.S3.** Temporal evolution of the spectra during the photodegradation of RhB mediated by BG 5.0. The inset is the optical image of the Rhodamine B after different interval of degradation.
